# Supplementary material
Source: HighWire-hosted journal article supplement (https://jnm.snmjournals.org/highwire/filestream/94244/field_highwire_adjunct_files/0/jnm079418_Supplemental_Figure_and_Table.pdf)
Supplement: jnm079418_Supplemental_Figure_and_Table.pdf [file jnm079418_Supplemental_Figure_and_Table.pdf]

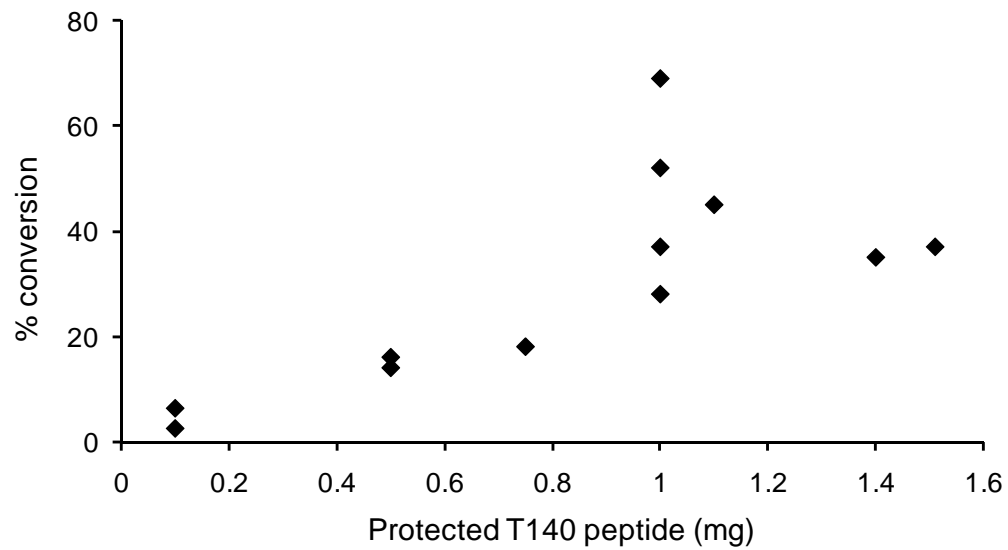

**Supplemental Figure 1.** Conversion of T140-protected peptide into 4-<sup>18</sup>F-T140 via conjugation reaction with <sup>18</sup>F-SFB, depending on the amount of the protected peptide. Reaction conditions are described in Materials and Methods.

**Supplemental Table 1.** %ID/g of blood, muscle and tumor 3 h postinjection of 4-<sup>18</sup>F-T140 in the presence of different amounts of cold 4-F-T140 (n = 5 or 6 mice per group).

|                                 | Blood       | Muscle      | Tumor       |
|---------------------------------|-------------|-------------|-------------|
| 4- <sup>18</sup> F-T140         | 14.3 ± 2.63 | 0.72 ± 0.22 | 2.3 ± 0.26  |
| 4- <sup>18</sup> F-T140 + 10 µg | 0.12 ± 0.04 | 0.12 ± 0.06 | 3.03 ± 0.31 |
| 4- <sup>18</sup> F-T140 + 20 µg | 0.19 ± 0.07 | 0.11 ± 0.04 | 1.76 ± 0.19 |
| 4- <sup>18</sup> F-T140 + 50 µg | 0.63 ± 0.36 | 0.34 ± 0.16 | 3.68 ± 1.0  |
